# Supplementary material for: EcDBS1R4, an Antimicrobial Peptide Effective against Escherichia coli with In Vitro Fusogenic Ability
Source: PubMed Central journal article supplement (PMC7730630; doi:10.3390/ijms21239104), 2020-11-30
Supplement: ijms-21-09104-s001.pdf [file ijms-21-09104-s001.pdf]

1 **Supporting Information**

2 **EcDBS1R4 an antimicrobial peptide with *in vitro* fusogenic ability selective to**  
3 ***Escherichia coli***

4 Marcin Makowski<sup>1</sup>, Mário R. Felício<sup>1</sup>, Isabel C. M. Fensterseifer<sup>2,3</sup>, Octávio L. Franco<sup>2,3,4</sup>,  
5 Nuno C. Santos<sup>1#</sup>, Sónia Gonçalves<sup>1#</sup>

6

7 <sup>1</sup>Instituto de Medicina Molecular, Faculdade de Medicina, Universidade de Lisboa,  
8 Lisbon, Portugal.

9 <sup>2</sup>Centro de Análises Proteômicas e Bioquímicas, Pós-graduação em Ciências  
10 Genômicas e Biotecnologia, Universidade Católica de Brasília, Brasília, DF, Brazil.

11 <sup>3</sup>Programa de Pós-Graduação em Patologia Molecular, Universidade de Brasília,  
12 Brasília, DF, Brazil.

13 <sup>4</sup>S-Inova Biotech, Pós-graduação em Biotecnologia, Universidade Católica Dom Bosco,  
14 Campo Grande, MS, Brazil.

15

16

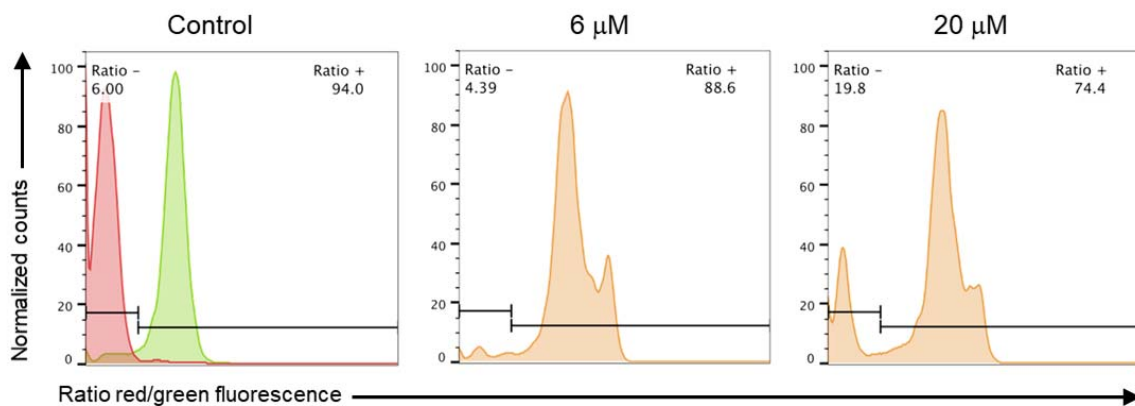

17

18 **Figure S1. Membrane surface potential studies of *E. coli* exposed to EcDBS1R4.**

19 Histograms of the fluorescence ratio obtained by flow cytometry for *Escherichia coli*  
20 (ATCC 25922) with 0, 6 and 20  $\mu\text{M}$  of EcDBS1R4. For staining, we used 15  $\mu\text{M}$  of 3,3'-  
21 diethyloxycarbocyanine iodide ( $\text{DiOC}_2(3)$ ), a green dye that accumulates on  
22 hyperpolarized membranes (green histogram), but that is red-shifted as the dye self-  
23 associates under larger membrane potentials<sup>1</sup>. 10  $\mu\text{M}$  of the proton ionophore carbonyl  
24 cyanide 3-chlorophenylhydrazone (CCCP) was used as a control of total depolarization  
25 (red histogram).

26

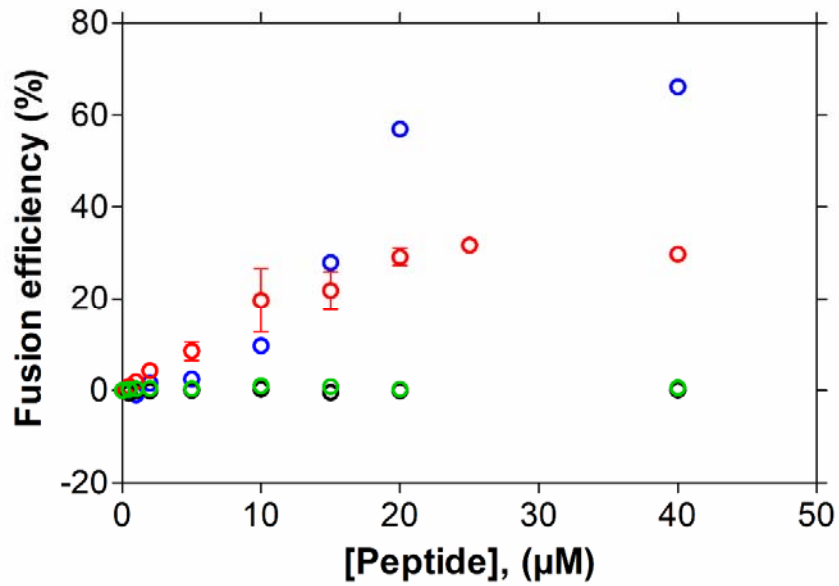

27

28 **Figure S2. Fusion / hemifusion efficiency of CL-rich lipid vesicles promoted by**  
 29 **titration with EcDBS1R4.** Percentage of fusion efficiency was calculated using equation  
 30 8. Lipid vesicles used were POPC (black), POPC:Chol (70:30) (green), POPG:CL (80:20)  
 31 (blue) and POPE:POPG:CL (20:60:20) (red).

32 **Table S1. *In silico* predicted interactions between EcDBS1R4 and**  
 33 **anionic/zwitterionic mimetic membranes<sup>2</sup>.**

| Membrane                     | Residue number | Peptide |          |      | Lipid |          |      | Distance, Å |
|------------------------------|----------------|---------|----------|------|-------|----------|------|-------------|
|                              |                | Residue | Position | Atom | Type  | Position | Atom |             |
| <b>POPC</b>                  | 1              | Lys     | 4        | NZ   | POPC  | 15       | O14  | 2.7         |
|                              | 2              | Arg     | 9        | NH1  | POPC  | 4        | O13  | 3.0         |
|                              | 3              | Val     | 15       | CG2  | POPC  | 2        | C15  | 3.4         |
|                              | 4              | Val     | 15       | CG1  | POPC  | 3        | C13  | 3.5         |
|                              | 5              | Trp     | 19       | NE1  | POPC  | 11       | O13  | 3.2         |
|                              | 6              | Trp     | 19       | NE1  | POPC  | 11       | O14  | 3.3         |
| <b>POPC:Chol<br/>(70:30)</b> | 1              | Lys     | 5        | NZ   | Chol  | 1        | O3   | 3.1         |
|                              | 2              | Arg     | 9        | NH1  | POPC  | 1        | O22  | 3.0         |
|                              | 3              | Lys     | 13       | NZ   | POPC  | 1        | O13  | 3.0         |
| <b>POPC:POPG<br/>(70:30)</b> | 1              | Met     | 2        | SD   | POPC  | 4        | O13  | 3.5         |
|                              | 2              | Lys     | 4        | NZ   | POPC  | 12       | O14  | 3.0         |
|                              | 3              | Ala     | 8        | O    | POPG  | 1        | OC2  | 3.3         |
|                              | 4              | Ala     | 8        | CB   | POPC  | 4        | C15  | 3.7         |
|                              | 5              | Arg     | 9        | NH2  | POPG  | 3        | OC2  | 3.1         |
|                              | 6              | Arg     | 9        | NH1  | POPC  | 10       | O22  | 2.9         |
|                              | 7              | Arg     | 9        | NH1  | POPC  | 10       | O14  | 3.3         |
|                              | 8              | Val     | 15       | O    | POPC  | 2        | O12  | 3.7         |
|                              | 9              | Val     | 15       | CG2  | POPC  | 6        | C13  | 3.7         |
|                              | 10             | Ala     | 16       | CB   | POPC  | 2        | C13  | 3.0         |
|                              | 11             | Trp     | 19       | NE1  | POPC  | 9        | O13  | 3.4         |

34

35 **References**

- 36 1. Domingues, M. M. *et al.* Antimicrobial protein rBPI21-induced surface changes on  
37 Gram-negative and Gram-positive bacteria. *Nanomedicine Nanotechnology, Biol.*  
38 *Med.* **10**, 543–551 (2014).
- 39 2. Cardoso, M. H. *et al.* A polyalanine peptide derived from polar fish with anti-  
40 infectious activities. *Sci. Rep.* **6**, 21385 (2016).

41
